# Supplementary material for: Lung carcinoma with small intestinal metastases and gastrointestinal bleeding: A rare case report
Source: PubMed Central journal article supplement — Oncol Lett. 2023 Apr 20;25(6):241. doi: 10.3892/ol.2023.13827 (PMC10161349; doi:10.3892/ol.2023.13827), 2023-04-20

Figure S1. Histological analyses of biopsied tissues of the right lung mass after resection (March 2020). (A) The tumor cells are polygonal, with a cytoplasm, eosinophilic, nuclear polygonal, and without any obvious adenoid structure (hematoxylin and eosin staining). (B) Tumor cells with positive staining for CK (wide). (C) Tumor cells with positive staining for CK7. (D) Tumor cells with positive staining for thyroid transcription factor-1. (E) Tumor cells with positive staining for Vimentin. (F) The tumor cells had a Ki-67 labeling index of 35% (immunohistochemical staining; magnification, x400). CK, cytokeratin.

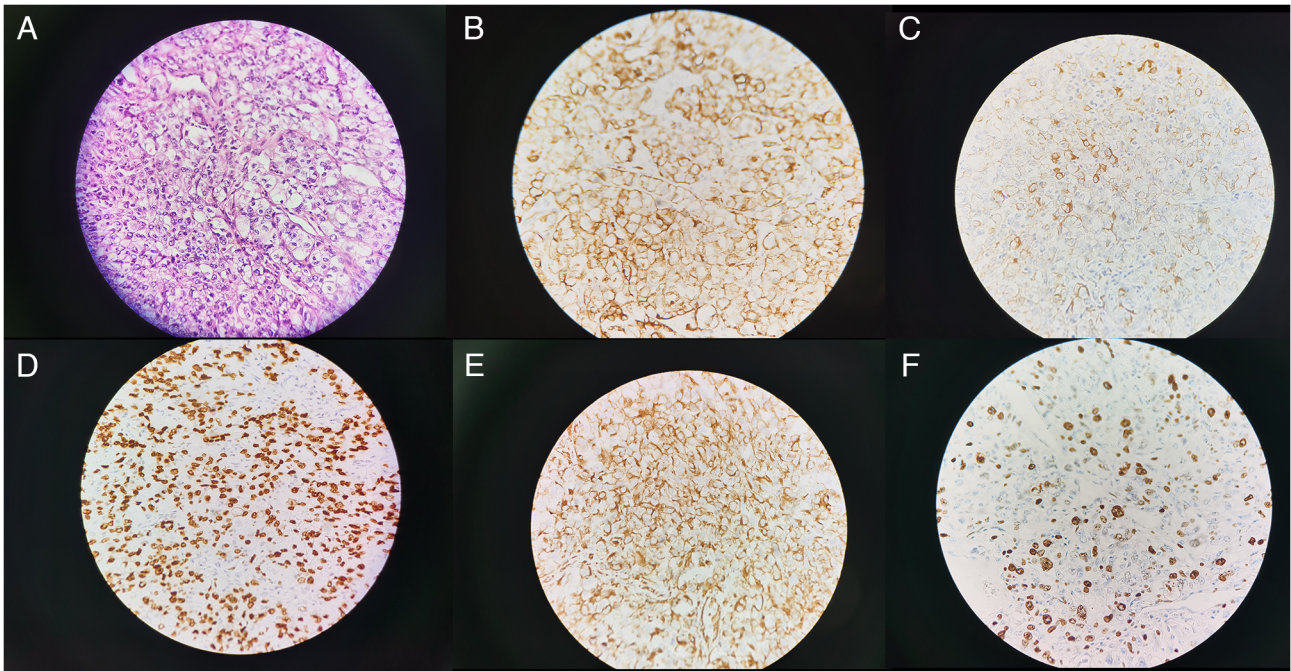

Supplement: Supplementary_Data.pdf [file Supplementary_Data.pdf]
